# Supplementary material for: Interleukin-1 signaling contributes to acute islet compensation
Source: JCI journal article supplement (doi:10.1172/jci.insight.86055), 2016-04-06
Supplement: sd1 [file 1]

You are being redirected.
